# Supplementary material for: Insights into the Evolution of Spermatogenesis-Related Ubiquitin–Proteasome System Genes in Abdominal Testicular Laurasiatherians
Source: MDPI journal article supplement (doi:10.3390/genes12111780), 2021-11-10
Supplement: s1 [file s1]

## Supplementary

Table S1. 25 spermatogenesis-associated UPS candidate genes

| Class of enzyme | Name                   | Testis phenotype of mutants                                                                                                                                                                    |
|-----------------|------------------------|------------------------------------------------------------------------------------------------------------------------------------------------------------------------------------------------|
| E1              | <i>UBA1/UBE1</i>       | Undefined                                                                                                                                                                                      |
|                 | <i>UBA7/UBE1L</i>      | Undefined                                                                                                                                                                                      |
| E2              | <i>UBE2A/HR6A</i>      | Fertile; showing normal spermatogenesis                                                                                                                                                        |
|                 | <i>UBE2B/HR6B</i>      | Infertility; sperm head shape anomalies, flagellar anomalies; apoptosis of primary spermatocytes in the first wave                                                                             |
| E3              | <i>RNF4</i>            | Infertility; depletion of germ cells; age-dependent testicular atrophy                                                                                                                         |
|                 | <i>RNF8</i>            | Infertility; defects in removal of whole nucleosomes during spermatogenesis due to reduced histone ubiquitination in the testis                                                                |
|                 | <i>RNF19A</i>          | Undefined                                                                                                                                                                                      |
|                 | <i>RAD18/RAD18Sc</i>   | Subfertility; defective MSCI; defective DSB repair during meiosis                                                                                                                              |
|                 | <i>ANAPC1</i>          | Undefined                                                                                                                                                                                      |
|                 | <i>MARCH7</i>          | Undefined                                                                                                                                                                                      |
|                 | <i>MARCH10</i>         | Undefined                                                                                                                                                                                      |
|                 | <i>CUL4B</i>           | Infertility; a progressive loss in germ cells; oligoasthenospermia; aberrant acrosomes in spermatids and nuclear morphology                                                                    |
|                 | <i>HERC4</i>           | Subfertility; angulated sperm tail; reduced sperm motility                                                                                                                                     |
|                 | <i>ITCH</i>            | Subfertility; delayed spermatid development; age dependent injury in spermatogenesis with increased apoptosis,                                                                                 |
|                 | <i>Mei4</i>            | Infertility; inability of spermatocytes lack of crossing over; failure of chromosome aggregation on the metaphase plate resulting in arrest in the spermatocyte stage and subsequent apoptosis |
|                 | <i>RFP</i>             | Undefined                                                                                                                                                                                      |
|                 | <i>TMF1/ARA160</i>     | Infertility; lack of motility; lack of acrosome in the spermatozoa                                                                                                                             |
| Proteasome      | <i>PSMA8</i>           | Infertility; stalled in the middle stage of meiosis I                                                                                                                                          |
|                 | <i>PSME4</i>           | Subfertility; hypospermatocytogenesis; defective nucleosomal removal in apoptotic spermatocytes and spermatids                                                                                 |
| DUB             | <i>USP2/UBP-testis</i> | Subfertility; lower motility in nutrient-deprived conditions; abnormal aggregation in                                                                                                          |

|              |                                                                                                                                                                      |
|--------------|----------------------------------------------------------------------------------------------------------------------------------------------------------------------|
|              | elongated spermatids                                                                                                                                                 |
| <i>USP14</i> | Spermatid differentiation                                                                                                                                            |
| <i>UCHL1</i> | Impaired spermatogenesis; decreased sperm concentration and motility; decreased spermatogonial stem cell proliferation and increased number of premeiotic germ cells |
| <i>UCHL3</i> | Increased germ cell loss and testicular atrophy following cryptorchid injury of the testis                                                                           |
| <i>UCHL5</i> | Undefined                                                                                                                                                            |
| <i>CYLD</i>  | Infertility; attenuation of early wave of germ cell apoptosis; spermatid deficiency                                                                                  |

---

Table S2. Information of genes sequences in this study

| Classification  | Species name                      | Accession number |                |                |                |                |                |                |
|-----------------|-----------------------------------|------------------|----------------|----------------|----------------|----------------|----------------|----------------|
|                 |                                   | <i>UCHL3</i>     | <i>PSMA8</i>   | <i>UCHL5</i>   | <i>USP14</i>   | <i>USP2</i>    | <i>RNF4</i>    | <i>MARCH10</i> |
| Cetartiodactyla | <i>Tursiops truncatus</i>         | XM_019921090.2   | XM_019930480.2 | XM_004322016.3 | XM_019930560.1 | XM_033861919.1 | XM_033856537.1 | XM_033848264.1 |
|                 | <i>Orcinus orca</i>               | XM_033414046.1   | XM_004273735.2 | XM_004275841.3 | XM_033435365.1 | XM_004273294.2 | XM_033419602.1 | XM_033438951.1 |
|                 | <i>Delphinapterus leucas</i>      | XM_030762626.1   | XM_022586873.2 | XM_022579206.1 | XM_030760684.1 | XM_022560281.2 | XM_022554761.2 | XM_022589088.2 |
|                 | <i>Physeter catodon</i>           | XM_028497491.1   | XM_007118278.2 | XM_028488075.1 | XM_028480320.1 | XM_007124219.3 | XM_007105074.3 | XM_024130194.2 |
|                 | <i>Balaenoptera acutorostrata</i> | XM_007186210.1   | XM_007197578.1 | XM_007191161.2 | XM_007191580.1 | XM_007196672.1 | XM_007172274.1 | XM_007175799.1 |
|                 | <i>Bos taurus</i>                 | XM_010810844.3   | XM_002697717.5 | XM_005216762.3 | NM_001075189.1 | NM_001046263.1 | XM_024993426.1 | XM_004432626.2 |
|                 | <i>Ovis aries</i>                 | XM_027973697.1   | XM_004020462.4 | XM_004013585.4 | XM_027961079.1 | XM_027979322.1 | XM_027971300.1 | XM_024980354.1 |
|                 | <i>Capra hircus</i>               | XM_018056500.1   | XM_018039666.1 | XM_005690458.3 | XM_018039483.1 | XM_005689552.3 | XM_018049833.1 | XM_027974358.1 |
|                 | <i>Sus scrofa</i>                 | XM_021065167.1   | XM_021096195.1 | DQ917642.1     | XM_021096161.1 | XM_005667434.3 | NM_001044528.2 | XM_018065317.1 |
|                 | <i>Vicugna pacos</i>              | XM_031684463.1   | XM_006205089.3 | XM_006203637.3 | XM_006205118.2 | XM_006207726.3 | XM_015246870.2 | XM_005653890.3 |
|                 | <i>Camelus ferus</i>              | XM_032496863.1   | XM_006187170.3 | XM_006186114.3 | BLAST          | XM_006175287.3 | XM_014558714.2 | XM_006199494.3 |
| Perissodactyla  | <i>Ceratotherium simum</i>        | BLAST            | BLAST          | BLAST          | BLAST          | BLAST          | XM_014788831.1 | XM_006177436.3 |
|                 | <i>Equus caballus</i>             | XM_005601275.3   | XM_001495329.4 | XM_023647533.1 | XM_023647532.1 | BLAST          | XM_023638492.1 | XM_023652261.1 |
| Carnivora       | <i>Neomonachus</i>                | XM_021697825.1   | XM_021686265.1 | XM_021686633.1 | XM_021686046.1 | XM_021696279.1 | XM_021677716.1 | XM_021678372.1 |
|                 | <i>schauinslandi</i>              |                  |                |                |                |                |                |                |
|                 | <i>Odobenus rosmarus</i>          | XM_012568190.1   | XM_004411329.2 | XM_004411339.2 | XM_004411207.2 | XM_004412584.1 | XM_004396209.2 | XM_012564311.1 |
|                 | <i>Canis lupus familiaris</i>     | XM_038431178.1   | XM_038672432.1 | XM_038448388.1 | XM_038672506.1 | XM_038664646.1 | XM_038442196.1 | XM_022422809.2 |

|              |                               |                |                |                |                |                |                |                |
|--------------|-------------------------------|----------------|----------------|----------------|----------------|----------------|----------------|----------------|
|              | <i>Mustela putorius furo</i>  | XM_004754395.2 | XM_004742862.2 | XM_004751496.2 | XM_004742809.2 | XM_004750053.2 | XM_013045800.1 | XM_004749230.2 |
|              | <i>Ailuropoda melanoleuca</i> | XM_011234332.3 | XM_002912678.4 | XM_002923389.4 | XM_002922622.4 | XM_034665971.1 | XM_002916543.4 | BLAST          |
|              | <i>Felis catus</i>            | XM_019828102.1 | XM_003995084.4 | XM_011291085.3 | XM_003995057.5 | XM_019811415.2 | XM_023253532.1 | XM_019818067.2 |
| Chiroptera   | <i>Pteropus vampyrus</i>      | XM_023536381.1 | XM_011360403.1 | XM_011360466.2 | XM_023530834.1 | XM_023525828.1 | XM_011374699.2 | XM_011368587.2 |
|              | <i>Pteropus alecto</i>        | XM_025048193.1 | XM_006920016.1 | XM_006920041.3 | XM_025038629.1 | XM_025047333.1 | XM_006919032.3 | XM_006912330.2 |
|              | <i>Myotis davidii</i>         | XM_015559224.1 | XM_006764885.2 | XM_006761341.2 | XM_006761874.2 | XM_006758700.2 | XM_006760124.2 | XM_006770277.2 |
|              | <i>Myotis lucifugus</i>       | XM_023751722.1 | XM_006104470.1 | XM_006103195.3 | XM_006097384.3 | NA             | XM_023745402.1 | XM_014458702.2 |
|              | <i>Eptesicus fuscus</i>       | XM_028149045.1 | XM_008148334.2 | XM_008149834.2 | XM_008160165.2 | XM_008150072.2 | XM_008150907.2 | XM_028157441.1 |
| Eulipotyphla | <i>Condylura cristata</i>     | XM_012723373.1 | XM_004683989.1 | XM_004685461.2 | XM_004683774.2 | XM_004689174.1 | XM_012724164.1 | XM_004693338.2 |
|              | <i>Erinaceus europaeus</i>    | XM_007531947.1 | BLAST          | XM_007539744.2 | XM_007537081.2 | XM_007523576.2 | XM_016194572.1 | XM_016190226.1 |

| Classification  | Species name                      | Accession number |                |                |                |                |                |                |
|-----------------|-----------------------------------|------------------|----------------|----------------|----------------|----------------|----------------|----------------|
|                 |                                   | <i>ANAPCI</i>    | <i>CUL4B</i>   | <i>CYLD</i>    | <i>HERC4</i>   | <i>ITCH</i>    | <i>Mei4</i>    | <i>PSME4</i>   |
| Cetartiodactyla | <i>Tursiops truncatus</i>         | XM_033838554.1   | XM_033849375.1 | XM_019932498.2 | XM_019936183.2 | XM_019950661.2 | XM_033836630.1 | XM_019942853.2 |
|                 | <i>Orcinus orca</i>               | XM_033399994.1   | XM_033416233.1 | XM_004264892.3 | XM_033407638.1 | XM_033433515.1 | XM_033428723.1 | XM_004286518.3 |
|                 | <i>Delphinapterus leucas</i>      | XM_022599309.2   | XM_022561852.1 | XM_030761535.1 | XM_022590698.2 | XM_022592619.2 | XM_022590481.1 | XM_022597155.1 |
|                 | <i>Physeter catodon</i>           | XM_028496614.1   | XM_007122043.3 | XM_028477431.1 | XM_024132087.2 | XM_028498438.1 | XM_024132967.1 | XM_024118664.2 |
|                 | <i>Balaenoptera acutorostrata</i> | XM_007197378.2   | XM_007178609.1 | XM_028162892.1 | XM_007167806.2 | XM_007193258.1 | XM_007167979.1 | XM_007190021.1 |
|                 | <i>Bos taurus</i>                 | XM_005212369.4   | XM_002699510.5 | NM_001046417.1 | NM_001076894.3 | BC133503.1     | XM_024996921.1 | NM_001205952.1 |
|                 | <i>Ovis aries</i>                 | XM_027967124.1   | XM_015105033.2 | XM_015100436.2 | XM_015104378.2 | XM_027977101.1 | XM_027972295.1 | XM_015094386.2 |
|                 | <i>Capra hircus</i>               | XM_018054804.1   | XM_018044199.1 | XM_013971026.2 | XM_018042293.1 | XM_005688476.3 | XM_018053506.1 | XM_005686603.3 |

|                |                               |                |                |                |                |                |                |                |
|----------------|-------------------------------|----------------|----------------|----------------|----------------|----------------|----------------|----------------|
|                | <i>Sus scrofa</i>             | XM_021087035.1 | XM_013986358.2 | XM_021094193.1 | XM_021072872.1 | GACC01000520.1 | XM_021092258.1 | XM_003125150.6 |
|                | <i>Vicugna pacos</i>          | XM_031692069.1 | XM_006215899.3 | XM_031680579.1 | XM_006212920.3 | XM_031687981.1 | XM_031679874.1 | XM_006211270.3 |
|                | <i>Camelus ferus</i>          | XM_014558298.2 | XM_032476122.1 | XM_032486293.1 | XM_032491503.1 | XM_006190776.3 | XM_032484497.1 | XM_006174442.3 |
| Perissodactyla | <i>Ceratotherium simum</i>    | XM_014791619.1 | BLAST          | XM_014788384.1 | XM_014784913.1 | XM_014787535.1 | XM_014781074.1 | BLAST          |
|                | <i>Equus caballus</i>         | XM_023618721.1 | XM_023634079.1 | XM_023636965.1 | XM_001503586.4 | XM_001916721.5 | XM_023650676.1 | XM_023619106.1 |
| Carnivora      | <i>Neomonachus</i>            | XM_021697340.1 | XM_021686083.1 | XM_021705825.1 | XM_021700187.1 | XM_021689031.1 | XM_021693619.1 | XM_021701246.1 |
|                | <i>schauinslandi</i>          |                |                |                |                |                |                |                |
|                | <i>Odobenus rosmarus</i>      | XM_012562159.1 | XM_004406921.2 | XM_004408513.2 | XM_004393708.2 | XM_012564988.1 | XM_012562208.1 | XM_004403665.2 |
|                | <i>Canis lupus familiaris</i> | XM_532958.7    | XM_038450783.1 | XM_005617568.4 | XM_038662710.1 | XM_022409130.2 | XM_014118115.3 | XM_038680568.1 |
|                | <i>Mustela putorius furo</i>  | XM_004770988.2 | XM_004762060.2 | XM_004744171.2 | XM_004777827.2 | XM_013053385.1 | XM_004752830.2 | XM_004775684.2 |
|                | <i>Ailuropoda melanoleuca</i> | XM_011231155.3 | XM_011229099.3 | XM_011218427.3 | XM_034662593.1 | XM_019796585.2 | XM_034648277.1 | XM_034659133.1 |
|                | <i>Felis catus</i>            | XM_003984262.5 | XM_011279431.3 | XM_023244894.1 | XM_011287365.2 | XM_003983597.5 | XM_006931862.2 | XM_023251673.1 |
| Chiroptera     | <i>Pteropus vampyrus</i>      | XM_023521936.1 | XM_011378241.2 | XM_023530669.1 | XM_023520115.1 | XM_011378287.2 | XM_011364921.2 | XM_011363964.2 |
|                | <i>Pteropus alecto</i>        | XM_006909446.3 | XM_015593967.2 | XM_025044597.1 | XM_025049386.1 | XM_006921736.3 | XM_006926811.2 | XM_006909599.2 |
|                | <i>Myotis davidii</i>         | XM_006769219.2 | XM_006767808.2 | XM_015572642.1 | XM_015562117.1 | XM_006764581.2 | XM_006772205.2 | XM_015557867.1 |
|                | <i>Myotis lucifugus</i>       | XM_023764404.1 | XM_006082148.3 | XM_006105966.3 | XM_023754626.1 | XM_006089425.2 | XM_023755201.1 | XM_023746830.1 |
|                | <i>Eptesicus fuscus</i>       | XM_008159952.2 | XM_028132046.1 | XM_028126899.1 | XM_028151457.1 | XM_008149714.2 | XM_008139546.2 | XM_028139915.1 |
| Eulipotyphla   | <i>Condylura cristata</i>     | XM_012727535.1 | XM_012727233.1 | XM_004693563.2 | XM_004680846.2 | XM_004687268.2 | XM_012730908.1 | XM_004686198.2 |
|                | <i>Erinaceus europaeus</i>    | XM_007532163.2 | XM_016191402.1 | XM_016194777.1 | XM_007524167.2 | XM_016187962.1 | XM_007521946.2 | XM_007527952.2 |

---

Accession number

---

| Classification  | Species name                      | <i>RAD18</i>   | <i>RFP</i>     | <i>UCHL1</i>   | <i>RNF19A</i>  | <i>TMF</i>     | <i>UBA1</i>    | <i>UBA7</i>    |
|-----------------|-----------------------------------|----------------|----------------|----------------|----------------|----------------|----------------|----------------|
| Cetartiodactyla | <i>Tursiops truncatus</i>         | XM_033865323.1 | XM_004330846.3 | XM_019928270.2 | XM_019925060.2 | XM_004330307.3 | XM_033850069.1 | XM_033864980.1 |
|                 | <i>Orcinus orca</i>               | XM_033437223.1 | XM_004286088.2 | XM_004268322.2 | XM_033438195.1 | XM_033424796.1 | XM_004281995.2 | XM_004267814.3 |
|                 | <i>Delphinapterus leucas</i>      | XM_022564695.1 | XM_022562132.2 | XM_022565351.2 | XM_022584691.2 | XM_022572588.2 | XM_022556334.2 | XM_022573094.1 |
|                 | <i>Physeter catodon</i>           | XM_024124120.2 | XM_007110733.3 | XM_024117960.2 | XM_007104846.3 | XM_007105914.3 | XM_007104174.3 | XM_007113963.3 |
|                 | <i>Balaenoptera acutorostrata</i> | XM_007192496.1 | XM_007179083.2 | XM_007178766.1 | XM_028164300.1 | XM_007192426.1 | XM_007183644.2 | XM_007168713.1 |
|                 | <i>Bos taurus</i>                 | XM_005222442.4 | NM_001075799.1 | XM_005207872.4 | NM_001191331.1 | NM_001206260.1 | NM_001102477.1 | NM_001012284.1 |
|                 | <i>Ovis aries</i>                 | XM_004018298.3 | XM_004019024.4 | XM_004009789.3 | XM_027973176.1 | XM_004018337.4 | XM_004022137.3 | XM_027957618.1 |
|                 | <i>Capra hircus</i>               | XM_005695644.2 | XM_018038518.1 | XM_005681551.3 | XM_018058303.1 | XM_005695752.3 | XM_018043651.1 | XM_005695943.2 |
|                 | <i>Sus scrofa</i>                 | NM_001142833.1 | XM_003128235.5 | AY459532.2     | XM_013996574.2 | XM_021069200.1 | XM_013990866.2 | XM_003132214.4 |
|                 | <i>Vicugna pacos</i>              | XM_006206888.3 | XM_006215241.2 | XM_015244020.2 | XM_031691200.1 | XM_006196477.3 | XM_006213407.3 | XM_006196316.3 |
|                 | <i>Camelus ferus</i>              | XM_032458862.1 | XM_006192028.3 | XM_006191755.3 | XM_032468187.1 | XM_032458108.1 | XM_032474489.1 | XM_006174109.3 |
| Perissodactyla  | <i>Ceratotherium simum</i>        | XM_004442198.2 | XM_004441740.2 | BLAST          | XM_014788090.1 | BLAST          | BLAST          | BLAST          |
|                 | <i>Equus caballus</i>             | XM_023620038.1 | XM_023624125.1 | NM_001081820.1 | XM_023648770.1 | XM_014731465.2 | XM_023634144.1 | XM_005600650.3 |
| Carnivora       | <i>Neomonachus</i>                | XM_021695067.1 | XM_021697099.1 | XM_021697826.1 | XM_021688697.1 | XM_021694908.1 | XM_021679602.1 | XM_021686973.1 |
|                 | <i>schauinslandi</i>              |                |                |                |                |                |                |                |
|                 | <i>Odobenus rosmarus</i>          | XM_004392719.1 | XM_004411293.1 | XM_004396136.2 | XM_004402351.2 | XM_012563807.1 | XM_004396744.1 | XM_004399254.1 |
|                 | <i>Canis lupus familiaris</i>     | XM_038565773.1 | XM_038446650.1 | XM_038480474.1 | XM_022426584.2 | XM_038427176.1 | XM_038449878.1 | XM_038427722.1 |
|                 | <i>Mustela putorius furo</i>      | XM_004738431.2 | XM_004779969.2 | XM_004764057.2 | XM_013064759.1 | XM_004738330.2 | XM_004754955.2 | XM_004760621.2 |
|                 | <i>Ailuropoda melanoleuca</i>     | XM_034658694.1 | XM_002928641.3 | XM_002926504.4 | XM_002913982.4 | XM_002924401.4 | XM_002917778.4 | XM_002920564.4 |

|               |                            |                |                |                |                |                |                |                |
|---------------|----------------------------|----------------|----------------|----------------|----------------|----------------|----------------|----------------|
|               | <i>Felis catus</i>         | XM_003982447.4 | XM_023254671.1 | XM_011281913.2 | XM_006943325.3 | XM_003982410.5 | XM_004000424.5 | XM_006928773.4 |
| Chiroptera    | <i>Pteropus vampyrus</i>   | XM_011370651.2 | XM_011381952.2 | XM_011362779.1 | XM_011376181.2 | XM_011358479.2 | XM_011380062.2 | XM_011364732.2 |
|               | <i>Pteropus alecto</i>     | XM_006917575.3 | XM_025044337.1 | XM_015597498.1 | XM_006916648.3 | XM_015593757.2 | XM_006906892.3 | XM_015587154.2 |
|               | <i>Myotis davidii</i>      | XM_015560350.1 | BLAST          | XM_006759327.2 | XM_006760292.2 | XM_015567947.1 | XM_015561992.1 | BLAST          |
|               | <i>Myotis lucifugus</i>    | XM_023749718.1 | BLAST          | XM_006088473.3 | XM_023763614.1 | XM_023758102.1 | XM_023760927.1 | XM_014448405.2 |
|               | <i>Eptesicus fuscus</i>    | XM_008151717.2 | BLAST          | XM_008140249.2 | XM_008148503.2 | XM_008154157.2 | XM_028127656.1 | XM_008157503.2 |
| Eulippotyphla | <i>Condylura cristata</i>  | XM_012732091.1 | XM_004695445.2 | XM_004681331.2 | XM_004679693.2 | XM_004675990.2 | XM_004689974.2 | XM_004676152.2 |
|               | <i>Erinaceus europaeus</i> | XM_007522261.2 | XM_007538640.2 | XM_007526999.2 | XM_007532786.2 | XM_007523323.1 | XM_007529642.2 | XM_016190081.1 |

| Classification  | Species name                      | Accession number |                |                |                |
|-----------------|-----------------------------------|------------------|----------------|----------------|----------------|
|                 |                                   | <i>UBE2A</i>     | <i>UBE2B</i>   | <i>RNF8</i>    | <i>MARCH7</i>  |
| Cetartiodactyla | <i>Tursiops truncatus</i>         | XM_004329769.3   | XM_004326503.2 | XM_019949791.2 | XM_019922517.2 |
|                 | <i>Orcinus orca</i>               | XM_004275810.3   | XM_004282119.3 | XM_004267655.2 | XM_033421819.1 |
|                 | <i>Delphinapterus leucas</i>      | XM_022562959.2   | XM_022588824.1 | XM_022581794.1 | XM_022569836.2 |
|                 | <i>Physeter catodon</i>           | XM_024128099.2   | XM_007107071.3 | XM_024122061.2 | XM_024122319.2 |
|                 | <i>Balaenoptera acutorostrata</i> | BLAST            | XM_007172150.2 | XM_007197935.2 | XM_007183151.2 |
|                 | <i>Bos taurus</i>                 | BC102100.1       | NM_001037459.2 | NM_001046216.1 | XM_015475216.2 |
|                 | <i>Ovis aries</i>                 | BLAST            | XM_004008801.3 | XM_027958350.1 | XM_027964909.1 |
|                 | <i>Capra hircus</i>               | XM_005700284.3   | XM_005682942.3 | XM_018039174.1 | XM_013969446.2 |
|                 | <i>Sus scrofa</i>                 | XM_001927284.4   | NM_001257356.1 | XM_005665930.3 | XM_021074770.1 |
|                 | <i>Vicugna pacos</i>              | XM_015243190.2   | XM_006212804.3 | XM_031688483.1 | XM_031678470.1 |

|                |                               |                |                |                |                |
|----------------|-------------------------------|----------------|----------------|----------------|----------------|
|                | <i>Camelus ferus</i>          | XM_032476127.1 | XM_006179617.3 | XM_032462982.1 | XM_032479549.1 |
| Perissodactyla | <i>Ceratotherium simum</i>    | BLAST          | BLAST          | XM_004424191.2 | XM_014785916.1 |
|                | <i>Equus caballus</i>         | XM_001492266.6 | XM_001504396.4 | XM_023624866.1 | XM_023622588.1 |
| Carnivora      | <i>Neomonachus</i>            | XM_021686228.1 | XM_021702227.1 | XM_021684698.1 | XM_021703029.1 |
|                | <i>schauinslandi</i>          |                |                |                |                |
|                | <i>Odobenus rosmarus</i>      | XM_004405225.2 | XM_004405451.2 | XM_004409774.2 | XM_004394827.2 |
|                | <i>Canis lupus familiaris</i> | XM_038450727.1 | XM_038616048.1 | XM_038683373.1 | BLAST          |
|                | <i>Mustela putorius furo</i>  | XM_004762093.2 | XM_004744962.2 | BLAST          | XM_004743915.2 |
|                | <i>Ailuropoda melanoleuca</i> | XM_034649995.1 | XM_002912915.4 | XM_011232114.3 | BLAST          |
|                | <i>Felis catus</i>            | XM_004000827.5 | XM_023255298.1 | XM_023253930.1 | XM_003990797.5 |
| Chiroptera     | <i>Pteropus vampyrus</i>      | XM_011380198.2 | XM_011362314.2 | XM_023527546.1 | XM_011358949.2 |
|                | <i>Pteropus alecto</i>        | XM_006904701.2 | XM_006923125.3 | XM_006907307.3 | XM_015596530.2 |
|                | <i>Myotis davidii</i>         | XM_006762329.2 | XM_006753550.2 | XM_015571884.1 | XM_006766473.2 |
|                | <i>Myotis lucifugus</i>       | XM_006082177.3 | XM_006086593.3 | XM_006104390.3 | XM_006083224.3 |
|                | <i>Eptesicus fuscus</i>       | XM_008156842.2 | XM_008142249.2 | XM_028161192.1 | XM_028141141.1 |
| Eulipotyphla   | <i>Condylura cristata</i>     | XM_004685745.2 | XM_004686729.2 | XM_012723334.1 | XM_012728344.1 |
|                | <i>Erinaceus europaeus</i>    | XM_007537210.2 | XM_007519906.2 | XM_016185883.1 | XM_007537376.2 |
| Primates       | <i>Homo sapiens</i>           |                |                | NM_003958.4    | NM_001376235.1 |
| Rodentia       | <i>Rattus norvegicus</i>      |                |                | NM_001025727.1 | XM_039104832.1 |
| Lagomorpha     | <i>Oryctolagus cuniculus</i>  |                |                | XM_008262860.2 | XM_008258623.2 |



|               |                                 |                |                |
|---------------|---------------------------------|----------------|----------------|
| Scandentia    | <i>Tupaia chinensis</i>         | XM_027771887.1 | XM_006160292.3 |
| Ameridelphia  | <i>Monodelphis domestica</i>    | XM_003340356.3 | XM_007494240.1 |
| Proboscidea   | <i>Loxodonta africana</i>       | XM_003340356.3 | XR_775560.2    |
| Sirenia       | <i>Trichechus manatus</i>       | XM_023734147.1 | XM_023730436.1 |
| Tubulidentata | <i>Orycteropus afer</i>         | XM_007939460.1 | XM_007941827.1 |
| Cingulata     | <i>Dasybus novemcinctus</i>     | XM_004484074.3 | XM_004463900.2 |
| Monotremata   | <i>Ornithorhynchus anatinus</i> | XM_029047718.2 | XM_029071808.2 |

---

BLAST: obtained from the local database blast; NA: Not available

Table S3. Positive selection analyses of spermatogenesis-related UPS genes by free-ratio model

| Gene           | Branch                                            | dN       | dS       | $\omega$ value |
|----------------|---------------------------------------------------|----------|----------|----------------|
| <i>UCHL3</i>   | <i>P.catodon</i>                                  | 0.020879 | 0.006814 | 3.06434        |
| <i>PSMA8</i>   | LCA of <i>T.truncatus</i> & <i>O.orca</i>         | 0.007289 | 0.005223 | 1.39569        |
|                | LCA of <i>O.orca</i> & <i>D.leucas</i>            | 0.007280 | 0.005029 | 1.44762        |
| <i>USP14</i>   | <i>O.orca</i>                                     | 0.007106 | 0.006319 | 1.1245         |
| <i>MARCH7</i>  | LCA of <i>E.europaeus</i> & <i>C.cristata</i>     | 0.003624 | 0.001498 | 2.41938        |
| <i>USP2</i>    | LCA of <i>E.europaeus</i> & <i>C.cristata</i>     | 0.006208 | 0.000793 | 7.82879        |
| <i>RNF4</i>    | <i>C.simum</i>                                    | 0.009778 | 0.009055 | 1.07985        |
| <i>MARCH10</i> | <i>C.ferus</i>                                    | 0.012444 | 0.010437 | 1.19232        |
|                | LCA of <i>M.putorius</i> & <i>N.schauinslandi</i> | 0.002919 | 0.001446 | 2.01887        |
|                | LCA of <i>D.leucas</i> & <i>O.orca</i>            | 0.013495 | 0.005334 | 2.53004        |
|                | LCA of <i>P.vampyrus</i> & <i>M.davidii</i>       | 0.012336 | 0.007176 | 1.71906        |
| <i>UBA7</i>    | <i>O.rosmarus</i>                                 | 0.018217 | 0.014629 | 1.24524        |
|                | LCA of <i>F.catus</i> & <i>C.simum</i>            | 0.006639 | 0.000891 | 7.44929        |
| <i>RNF8</i>    | LCA of <i>T.truncatus</i> & <i>O.orca</i>         | 0.002884 | 0.002358 | 1.22295        |
|                | LCA of <i>F.catus</i> & <i>M.davidii</i>          | 0.012038 | 0.008742 | 1.37713        |
| <i>RAD18</i>   | LCA of <i>E.europaeus</i> & <i>C.cristata</i>     | 0.000408 | 0.000211 | 1.93453        |
|                | <i>M.lucifugus</i>                                | 0.007201 | 0.002231 | 3.22728        |
| <i>PSME4</i>   | LCA of <i>F.catus</i> & <i>M.davidii</i>          | 0.001314 | 0.000872 | 1.50661        |
| <i>Mei4</i>    | <i>P.catodon</i>                                  | 0.013724 | 0.007622 | 1.80062        |
|                | LCA of <i>F.catus</i> & <i>A.melanoleuca</i>      | 0.014740 | 0.005909 | 2.49452        |
| <i>ITCH</i>    | LCA of <i>F.catus</i> & <i>M.davidii</i>          | 0.000491 | 0.000418 | 1.17442        |
| <i>ANAPC1</i>  | LCA of <i>T.truncatus</i> & <i>O.orca</i>         | 0.000241 | 0.000026 | 9.35368        |
|                | LCA of <i>F.catus</i> & <i>M.davidii</i>          | 0.001235 | 0.000593 | 2.08056        |
| TMF            | <i>C.ferus</i>                                    | 0.005002 | 0.004523 | 1.10605        |
|                | <i>Capra hircus</i>                               | 0.000406 | 0.000255 | 1.59098        |

Table S4. Positive selection analyses of spermatogenesis-related UPS genes by two-ratio model

| Gene           | Branch                                        | $\omega$ value | 2 $\Delta$ lnL | $p$ value<br>$p < 0.05$ | Adjusted $p$ |
|----------------|-----------------------------------------------|----------------|----------------|-------------------------|--------------|
| <i>UCHL3</i>   | <i>P.catodon</i>                              | 4.00226        | 30.859968      | 2.77334E-08             | 6.93335E-07  |
|                | LCA of <i>B.acutorostrata</i> & <i>O.orca</i> | 1.18056        | 6.36654        | 0.011629212             | 0.096910104  |
| <i>PSMA8</i>   | LCA of <i>O.orca</i> & <i>T.truncatus</i>     | 1.42432        | 11.14066       | 0.000844558             | 0.021113959  |
|                | LCA of <i>O.orca</i> & <i>D.leucas</i>        | 1.556          | 11.159808      | 0.000835886             | 0.010448572  |
| <i>USP14</i>   | <i>O.orca</i>                                 | 1.09446        | 19.426548      | 1.04544E-05             | 6.93335E-07  |
| <i>MARCH7</i>  | LCA of <i>E.europaeus</i> & <i>C.cristata</i> | 6.68952        | 4.00992        | 0.045233297             | 0.161547489  |
| <i>MARCH10</i> | LCA of <i>D.leucas</i> & <i>O.orca</i>        | 2.6436         | 10.459168      | 0.001220422             | 0.010170186  |
|                | <i>C.ferus</i>                                | 1.29721        | 4.98311        | 0.02559593              | 0.127979651  |
| <i>UBA7</i>    | <i>O.rosmarus</i>                             | 1.30561        | 15.875692      | 6.76419E-05             | 0.001691049  |
|                | LCA of <i>F.catus</i> & <i>C.simum</i>        | 8.03186        | 5.699768       | 0.016967156             | 0.424178889  |
| <i>Mei4</i>    | <i>P.catodon</i>                              | 1.7988         | 5.108186       | 0.023813206             | 0.198443383  |
|                | LCA of <i>C.lupus</i> & <i>A.melanoleuca</i>  | 2.75833        | 7.087416       | 0.007762709             | 0.097033868  |
|                | LCA of <i>F.catus</i> & <i>M.davidii</i>      | 3.71722        | 5.206544       | 0.022502021             | 0.112510105  |

Table S5. Rapid evolution analyses of spermatogenesis-related UPS genes by two-ratio model

| Gene         | 2 $\Delta$ lnL | $\omega$ in scrotal testicular<br>mammals | $\omega$ in abdominal<br>testicular mammals | $p$ value<br>$p < 0.05$ | Adjusted $p$ |
|--------------|----------------|-------------------------------------------|---------------------------------------------|-------------------------|--------------|
| <i>UBE2A</i> | 11.655552      | 0.02689                                   | 0.11116                                     | 0.000640112             | 0.008001401  |
| <i>UCHL3</i> | 6.81078        | 0.16734                                   | 0.07602                                     | 0.009060918             | 0.045304589  |
| <i>HERC4</i> | 8.487604       | 0.0506                                    | 0.08967                                     | 0.003575744             | 0.029797867  |
| <i>PSME4</i> | 8.297916       | 0.0517                                    | 0.07572                                     | 0.00396906              | 0.024806624  |
| <i>PSMA8</i> | 4.006612       | 0.05689                                   | 0.09543                                     | 0.045322138             | 0.161864779  |
| <i>USP2</i>  | 4.04734        | 0.09427                                   | 0.1306                                      | 0.044241004             | 0.184337517  |
| <i>RFP</i>   | 24.878692      | 0.03784                                   | 0.00731                                     | 6.10535E-07             | 1.52634E-05  |

Table S6. Positive selection analyses of spermatogenesis-related UPS genes by branch-site model

| Gene           | Branch                                          | 2ΔlnL    | p value<br><i>p</i> <0.05 | Adjusted <i>p</i> | ω value | Positively selected sites (PP > 0.8)                                                                                                                                                                      |
|----------------|-------------------------------------------------|----------|---------------------------|-------------------|---------|-----------------------------------------------------------------------------------------------------------------------------------------------------------------------------------------------------------|
| <i>UCHL3</i>   | <i>P.catodon</i>                                |          |                           |                   |         | 5 R 0.979* 8<br>P 0.980* 31<br>F 0.983* 224 P<br>0.982* 236 A<br>0.982* 252 P<br>0.981* 270 I<br>0.982* 273 C<br>0.980* 278 E<br>0.982* 284 L<br>0.979*                                                   |
| <i>PSMA8</i>   | LCA of<br><i>T.truncatus</i> &<br><i>O.orca</i> | 4.249994 | 0.039250469               | 0.981261729       | 5.33697 | 19 L 0.946<br>40 A 0.938<br>214 G 0.948                                                                                                                                                                   |
| <i>MARCH10</i> | LCA of <i>D.leucas</i><br>& <i>O.orca</i>       |          |                           |                   |         | 75 K 0.936 82<br>G 0.890 106 H<br>0.933 119 N<br>0.937 147 I<br>0.922 221 K<br>4.236318 0.039567891 0.329732423 11.68875 0.935 551<br>H 0.922 608 N<br>0.919 691 S<br>0.933 734 A<br>0.935 776 G<br>0.919 |
| <i>RAD18</i>   | <i>C.cristata</i>                               | 6.042904 | 0.013962299               | 0.174528736       | 4.16586 | 6 E 0.949<br>110 K 0.955*<br>174 S 0.951*<br>501 N 0.913                                                                                                                                                  |
| <i>CYLD</i>    | <i>M.davidii</i>                                | 4.511314 | 0.033671364               | 0.42089205        | 8.56895 | 111 S 0.979*<br>309 Q 0.960*                                                                                                                                                                              |

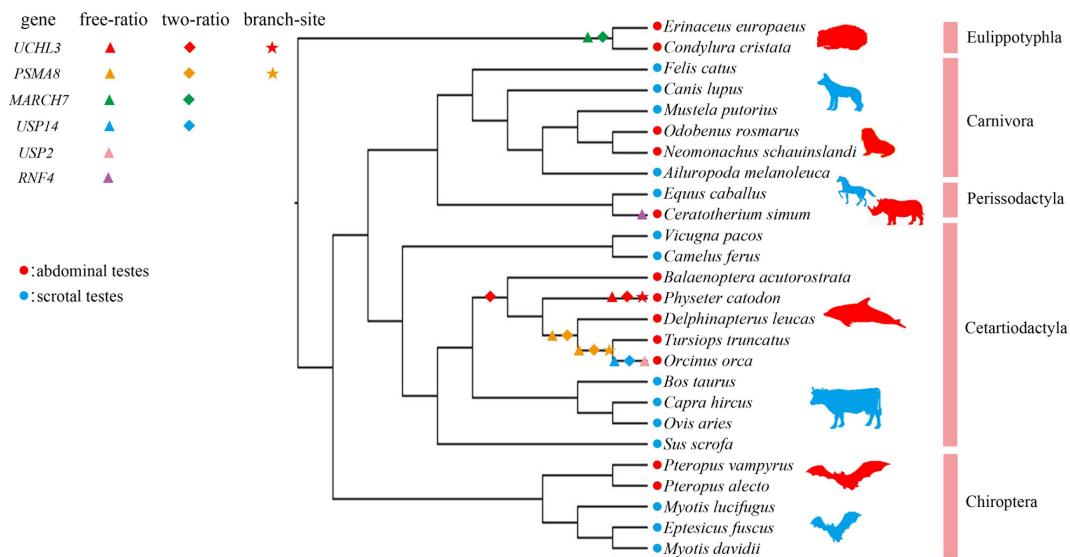

Figure S1. All abdominal testicular branches-specific positively selected genes. Positively selected branches identified by the free-ratio model and two-ratio model are represented by triangles and diamonds, respectively. The six abdominal testicular branches-specific positively selected genes are marked with different colors: *UCHL3* (red), *PSMA8* (orange), *USP14* (blue), *MARCH7* (green), *USP2* (pink) and *RNF4* (purple). The mammals with abdominal testes are shown in red, and mammals with scrotal testicular are in blue. *P* value tested by LRT<0.05.

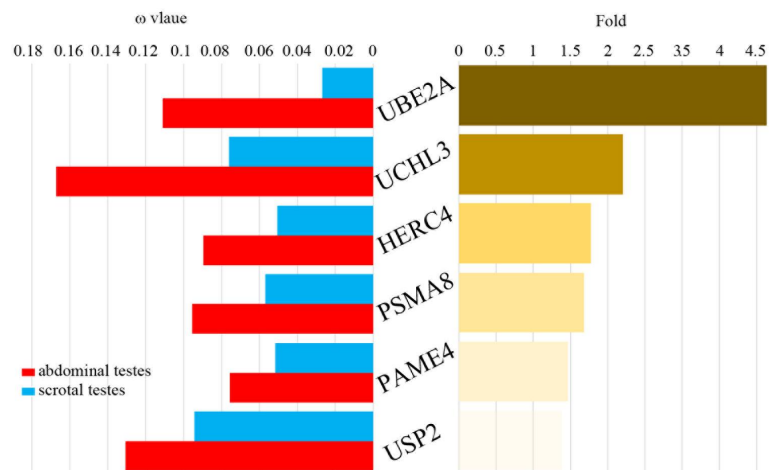

Figure S2. All rapidly evolving genes in abdominal testicular lineages. The nested branch model (two-ratio model) was used to calculate the selection pressure of the foreground branch (abdominal testicular species) and the foreground branches (scrotal testicular species). The left side shows the  $\omega$  values of the four accelerated genes for the abdominal testicular and the scrotal testicular species. The  $\omega$  values of all the genes for the abdominal testicular species

are greater than those of the scrotal testicular species. The right side shows the difference between the  $\omega$  values of the abdominal and the scrotal testicular species of the four genes, sorted according to the difference from high to low.  $P$  value tested by LRT<0.05.

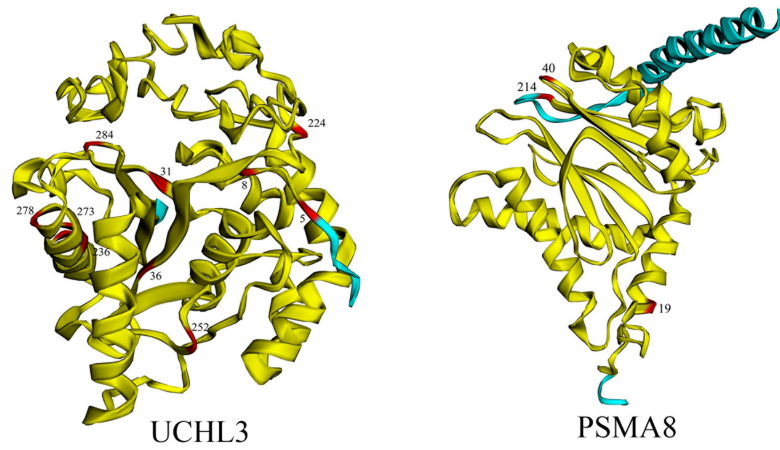

Figure S3. Distribution of positively selected sites on the 3D structure of proteins. The yellow represents the domain sequence, the red represents the positive selection site, and the blue represents the non-domain sequence.  $P$  value tested by LRT<0.05. Posterior probabilities  $\geq 0.8$ .
